# Supplementary material for: Predicting miscibility in binary compounds: a machine learning and genetic algorithm study
Source: Royal Society of Chemistry journal article supplement (doi:10.1039/d4cp03879g), 2024-12-13
Supplement: d4cp03879g1.pdf [file d4cp03879g1.pdf]

## Supplementary information of Predicting Miscibility in Binary Compounds: A Machine Learning and Genetic Algorithm Study

Chiwen Feng,<sup>a‡</sup> Yanwei Liang,<sup>a‡</sup> Jiaying Sun,<sup>b</sup> Renhai Wang,<sup>\* ac</sup> Huaijun Sun,<sup>d</sup>  
and Huafeng Dong<sup>ac</sup>

<sup>a</sup> School of Physics and Optoelectronic Engineering, Guangdong University of Technology,  
Guangzhou 510006, China. E-mail: wangrh@gdut.edu.cn

<sup>b</sup> College of Chemistry, Zhengzhou University, Zhengzhou 450001, China.

<sup>c</sup> Guangdong Provincial Key Laboratory of Sensing Physics and System Integration  
Applications, Guangdong University of Technology, Guangzhou 510006, China.

<sup>d</sup> Jiyang College of Zhejiang Agriculture and Forestry University, Zhuji, 311800, China.

‡ C. F. and Y. L. contributed equally. All the authors agreed to the final version of  
the manuscript.

### Table of Contents

**Fig. S1** Distribution of ignition point, molar volume, melting point, atomic covalent radius, and electronegativity in binary systems.

**Fig. S2** Comparison of the F1-score performance of six machine learning algorithms in the task of predicting whether a binary system is miscible.

**Table S3** Key hyperparameters and their setting of six algorithms.

**Table S4** Partial classification results for different labels in binary systems.

**Table S5** Structure database of Co-Eu system.

**Table S6** Crystallographic data of CoEu<sub>8</sub>.

**Table S7** Crystallographic data of Co<sub>3</sub>Eu<sub>2</sub>.

**Table S8** Crystallographic data of CoEu.

**Fig. S9** Phonon band structures of Eu<sub>2</sub>Co<sub>3</sub>.

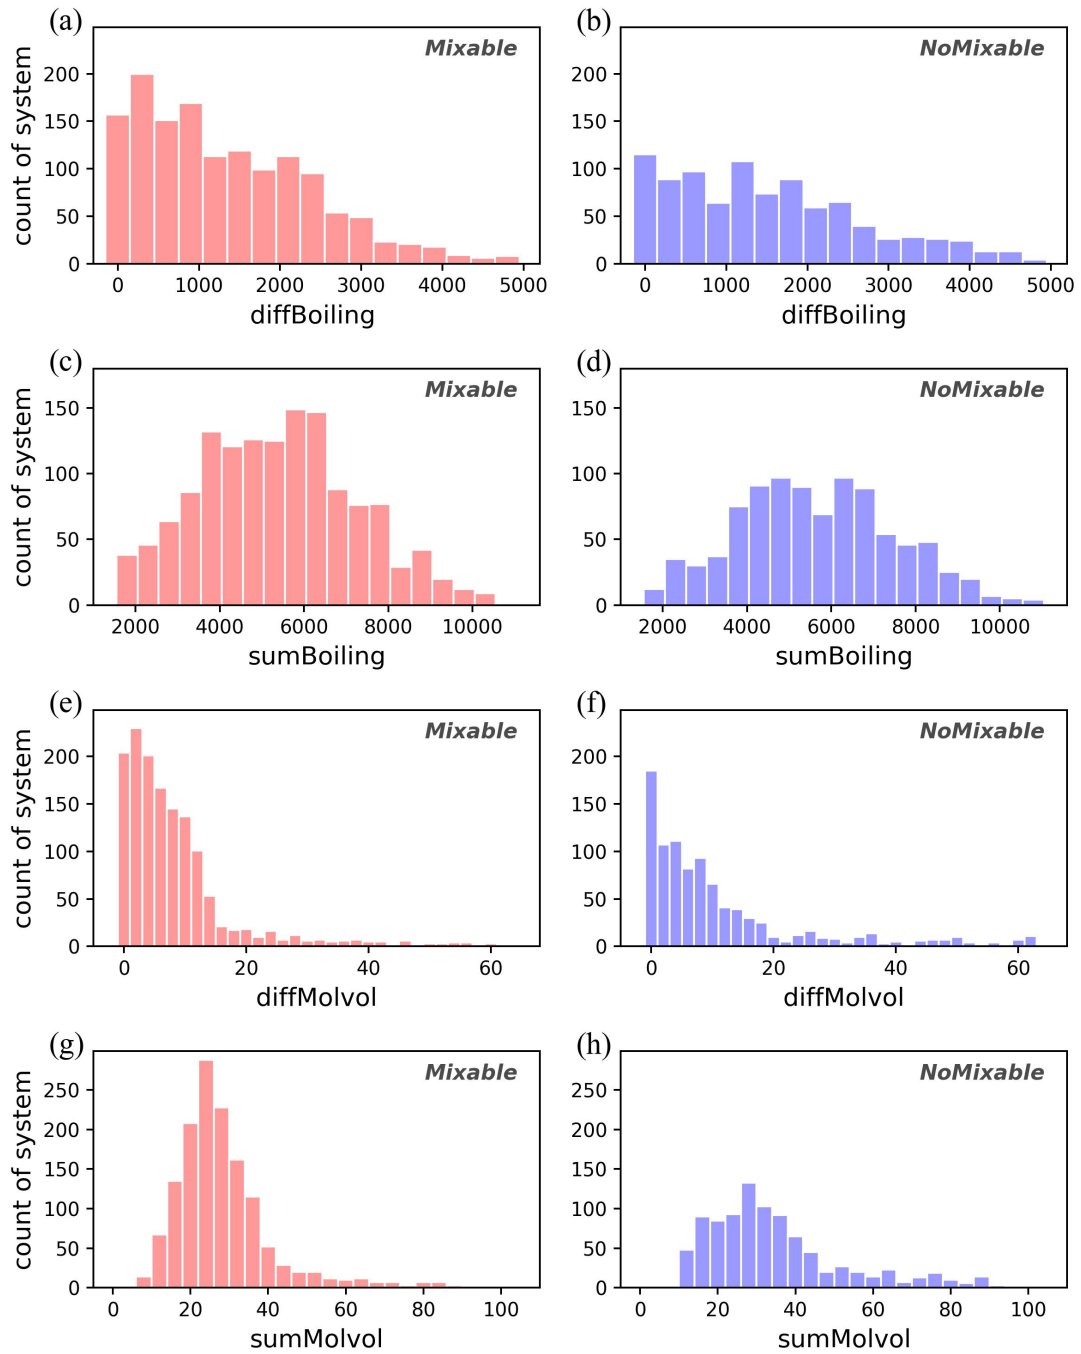

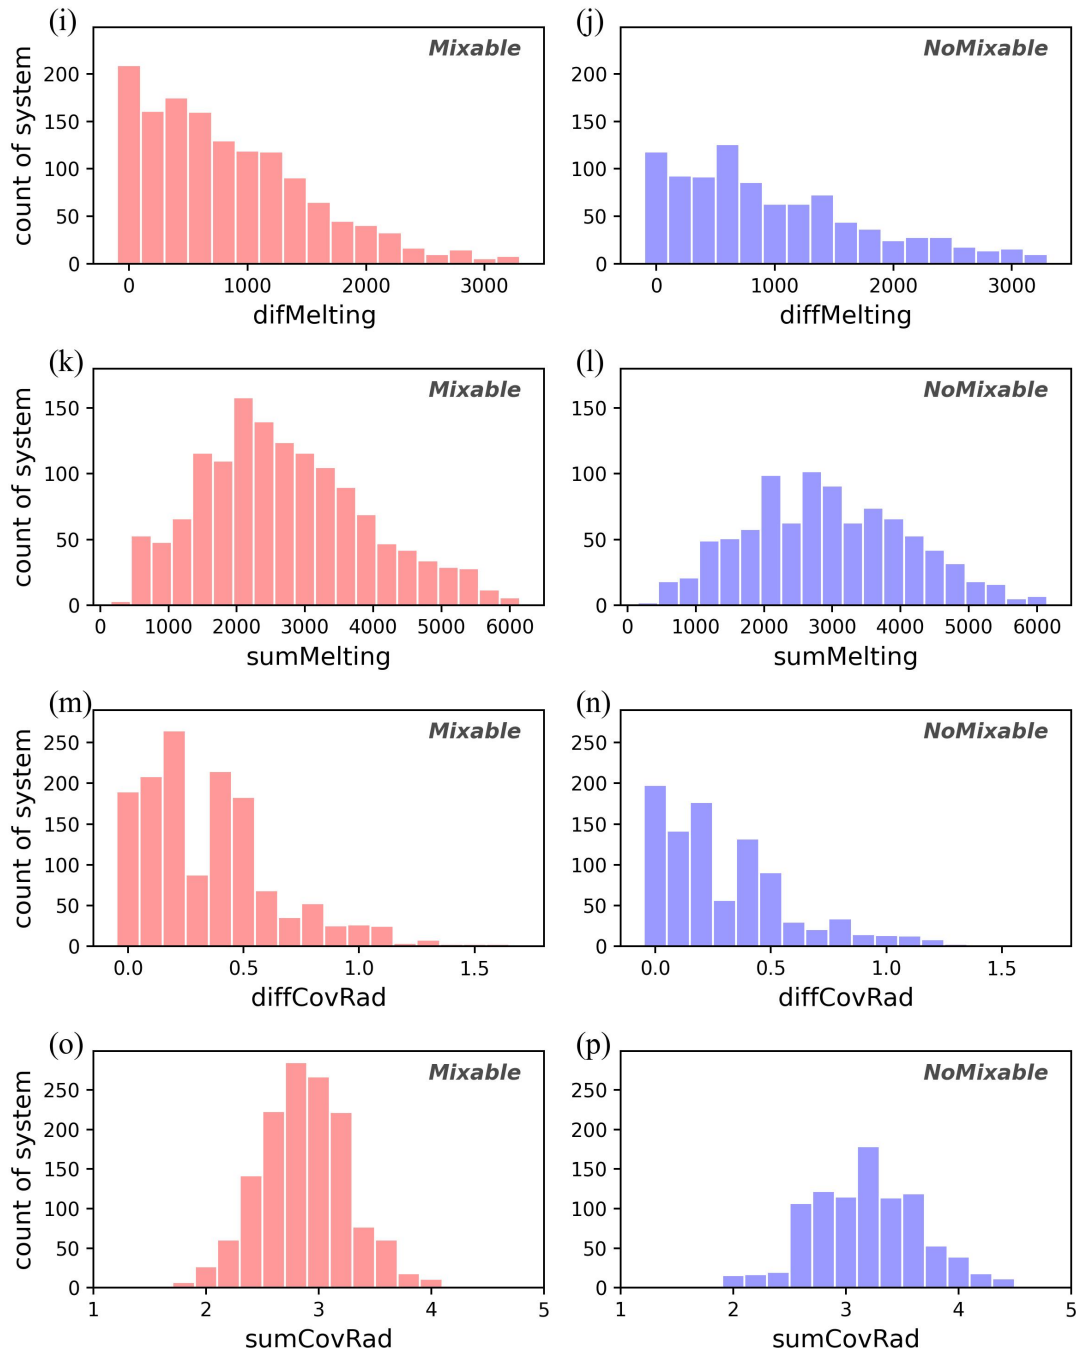

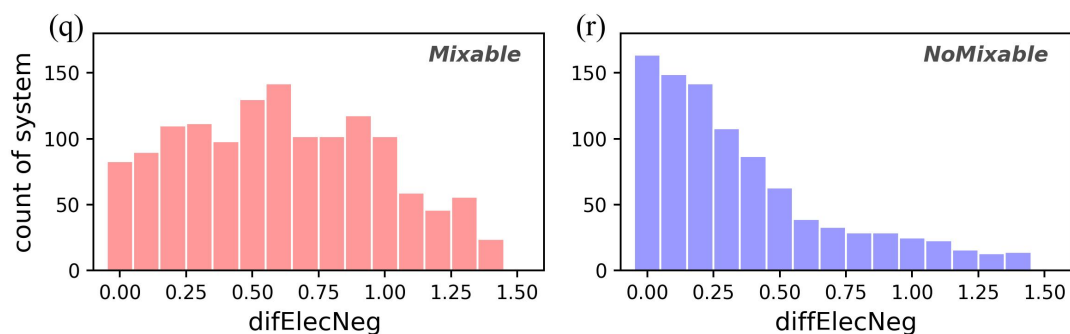

Fig. S1 Distribution of ignition point, molar volume, melting point, atomic covalent radius, and electronegativity in binary systems. The left side depicts the distribution of miscible binary systems, while the right side shows the distribution of immiscible binary systems.

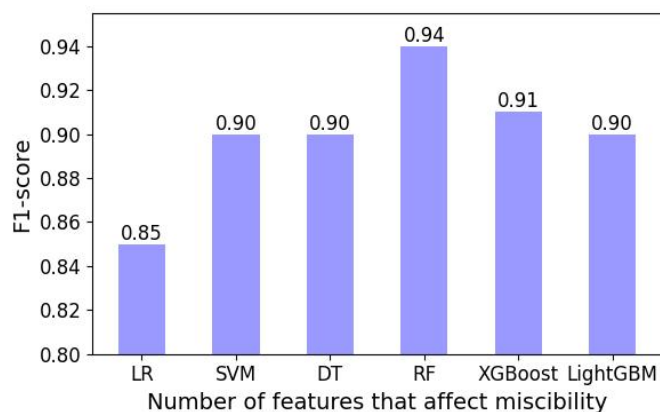

Fig. S2 Comparison of the F1-score performance of six machine learning algorithms in the task of predicting whether a binary system is miscible.

Table S3 Key hyperparameters and their setting of six algorithms.

| Algorithm | Hyperparameters   | Setting   |
|-----------|-------------------|-----------|
| LR        | solver            | liblinear |
| DT        | criterion         | entropy   |
|           | min_samples_split | 2         |
| SVM       | C                 | 10        |
| RF        | n_estimators      | 10        |
|           | criterion         | entropy   |
|           | min_samples_split | 2         |
| XGBoost   | n_estimators      | 10        |
| LightGBM  | n_estimators      | 10        |

Table S4 Partial classification results for different labels in binary systems (weighted average).

| Label                                            | Precision | Recall | F1-score | Support |
|--------------------------------------------------|-----------|--------|----------|---------|
| diffElecNeg, sumElecNeg                          | 0.71      | 0.71   | 0.71     | 470     |
| diffCovRad, sumCovRad                            | 0.66      | 0.67   | 0.66     | 470     |
| diffMelting, sumMelting                          | 0.56      | 0.55   | 0.56     | 470     |
| diffBoiling, sumBoiling                          | 0.61      | 0.61   | 0.61     | 470     |
| diffMolVol, sumMolVol                            | 0.68      | 0.67   | 0.68     | 470     |
| sumElecNeg, sumMolVol                            | 0.72      | 0.72   | 0.72     | 470     |
| diffElecNeg, sumMolVol                           | 0.72      | 0.71   | 0.71     | 470     |
| diffElecNeg, diffMolVol                          | 0.69      | 0.68   | 0.69     | 470     |
| sumElecNeg, diffMolVol                           | 0.73      | 0.73   | 0.73     | 470     |
| sumWEle, diffWEle                                | 0.89      | 0.89   | 0.89     | 470     |
| diffElecNeg, sumElecNeg, diffUnoccupy            | 0.73      | 0.73   | 0.73     | 470     |
| sumElecNeg, sumWEle, diffWEle                    | 0.90      | 0.90   | 0.90     | 470     |
| diffElecNeg, sumWEle, diffWEle                   | 0.87      | 0.87   | 0.87     | 470     |
| diffElecNeg, sumElecNeg, diffMolVol, sumMolVol   | 0.79      | 0.79   | 0.79     | 470     |
| diffElecNeg, sumElecNeg, diffCovRad, sumCovRad   | 0.79      | 0.79   | 0.79     | 470     |
| diffBoiling, sumBoiling, diffMolVol, sumMolVol   | 0.74      | 0.74   | 0.74     | 470     |
| diffCovRad, sumCovRad, diffMelting, sumMelting   | 0.76      | 0.76   | 0.76     | 470     |
| diffCovRad, sumCovRad, diffBoiling, sumBoiling   | 0.73      | 0.73   | 0.73     | 470     |
| diffCovRad, sumCovRad, diffMolVol, sumMolVol     | 0.73      | 0.72   | 0.72     | 470     |
| diffMelting, sumMelting, diffBoiling, sumBoiling | 0.67      | 0.67   | 0.67     | 470     |
| diffMelting, sumMelting, diffMolVol, sumMolVol   | 0.74      | 0.74   | 0.774    | 470     |
| diffCovRad, diffMelting, diffBoiling, diffMolVol | 0.70      | 0.70   | 0.70     | 470     |
| sumCovRad, sumMelting, sumBoiling, sumMolVol     | 0.75      | 0.76   | 0.75     | 470     |
| diffElecNeg, diffUnoccupy, sumWEle, diffWEle     | 0.90      | 0.89   | 0.89     | 470     |

|                                                               |      |      |      |     |
|---------------------------------------------------------------|------|------|------|-----|
| sumCovRad, diffUnoccupy, sumWEle, diffWEle                    | 0.86 | 0.86 | 0.86 | 470 |
| diffCovRad, diffUnoccupy, sumWEle, diffWEle                   | 0.88 | 0.87 | 0.87 | 470 |
| sumMelting, diffUnoccupy, sumWEle, diffWEle                   | 0.86 | 0.85 | 0.85 | 470 |
| diffMelting, diffUnoccupy, sumWEle, diffWEle                  | 0.70 | 0.89 | 0.89 | 470 |
| sumMolVol, diffUnoccupy, sumWEle, diffWEle                    | 0.89 | 0.88 | 0.88 | 470 |
| diffMolVol, diffUnoccupy, sumWEle, diffWEle                   | 0.88 | 0.87 | 0.87 | 470 |
| sumBoiling, diffUnoccupy, sumWEle, diffWEle                   | 0.88 | 0.88 | 0.88 | 470 |
| diffBoiling, diffUnoccupy, sumWEle, diffWEle                  | 0.88 | 0.89 | 0.89 | 470 |
| diffBoiling, diffUnoccupy, sumWEle, diffWEle                  | 0.88 | 0.89 | 0.89 | 470 |
| diffElecNeg, sumElecNeg, diffUnoccupy, sumWEle, diffWEle      | 0.73 | 0.73 | 0.73 | 470 |
| diffElecNeg, sumElecNeg, diffUnoccupy, diffCovRad, sumCovRad  | 0.79 | 0.79 | 0.79 | 470 |
| diffElecNeg, sumElecNeg, diffUnoccupy, diffMolVol, sumMolVol  | 0.79 | 0.79 | 0.79 | 470 |
| diffCovRad, sumCovRad, diffMelting, sumMelting, sumElecNeg    | 0.83 | 0.83 | 0.83 | 470 |
| sumCovRad, sumMelting, sumBoiling, sumMolVol, sumElecNeg      | 0.82 | 0.83 | 0.82 | 470 |
| diffCovRad, diffMelting, diffBoiling, diffMolVol, diffElecNeg | 0.79 | 0.79 | 0.79 | 470 |

---

Table S5 Structure database of Co-Eu system.

|          | Phases | Symmetry                  | a(Å) | b(Å) | c(Å) | $E_{\text{total}}$ (eV/atom) | $E_f$ (meV/atom) | $E_d$ (meV/atom) |
|----------|--------|---------------------------|------|------|------|------------------------------|------------------|------------------|
| Existing | Co     | <i>Fm-3m</i>              | 3.51 | 3.51 | 3.51 | -7.11                        | 0                | 0                |
| Stable   |        |                           |      |      |      |                              |                  |                  |
| Phases   | Eu     | <i>P6<sub>3</sub>/mmc</i> | 3.99 | 6.96 | 6.34 | -10.26                       | 0                | 0                |

Table S6 Crystallographic data of CoEu<sub>8</sub>(space group P1).

| Phases            | Lattice           | Wyckoff         | Atome           | x        | y       | z       |
|-------------------|-------------------|-----------------|-----------------|----------|---------|---------|
|                   | Parameter         | Site            |                 |          |         |         |
| CoEu <sub>8</sub> |                   | 1a              | Co              | -0.00291 | 0.49807 | 0.11189 |
|                   |                   | 1a              | Eu <sup>1</sup> | 0.24069  | 0.74115 | 0.35438 |
|                   | $\alpha=89.9969$  | 1a              | Eu <sup>2</sup> | 0.74783  | 0.74837 | 0.61301 |
|                   | $\beta=89.9915$   | 1a              | Eu <sup>3</sup> | 0.24801  | 0.24774 | 0.61219 |
|                   | $\gamma=111.3986$ | 1a              | Eu <sup>4</sup> | 0.75453  | 0.25405 | 0.35463 |
|                   | a=6.91217Å        | 1a              | Eu <sup>5</sup> | 0.75340  | 0.25470 | 0.86981 |
|                   | b=6.87135Å        | 1a              | Eu <sup>6</sup> | 0.23611  | 0.25703 | 0.11167 |
|                   | c=7.93359Å        | 1a              | Eu <sup>7</sup> | 0.75694  | 0.73764 | 0.11346 |
|                   | 1a                | Eu <sup>8</sup> | 0.24024         | 0.74154  | 0.86964 |         |

Table S7 Crystallographic data of Co<sub>3</sub>Eu<sub>2</sub>(space group P1).

| Phases                          | Lattice          | Wyckoff | Atome           | x       | y       | z       |
|---------------------------------|------------------|---------|-----------------|---------|---------|---------|
|                                 | Parameter        | Site    |                 |         |         |         |
| Co <sub>3</sub> Eu <sub>2</sub> | $\alpha=89.7127$ | 1a      | Co <sup>1</sup> | 0.67957 | 0.22008 | 0.92146 |
|                                 | $\beta=60.0518$  | 1a      | Co <sup>2</sup> | 0.01326 | 0.17782 | 0.25517 |
|                                 | $\gamma=89.6778$ | 1a      | Co <sup>3</sup> | 0.34695 | 0.13549 | 0.58886 |
|                                 | a=4.03030Å       |         |                 |         |         |         |
|                                 | b=8.44895Å       | 1a      | Eu <sup>1</sup> | 0.68288 | 0.90163 | 0.92416 |
|                                 | c=4.03062Å       | 1a      | Eu <sup>2</sup> | 0.34442 | 0.45379 | 0.58582 |

Table S8 Crystallographic data of CoEu(space group P1).

| Phases | Lattice          | Wyckoff | Atome           | x       | y       | z       |
|--------|------------------|---------|-----------------|---------|---------|---------|
|        | Parameter        | Site    |                 |         |         |         |
| CoEu   | $\alpha=90.0881$ | 1a      | Co <sup>1</sup> | 0.16576 | 0.00019 | 0.17525 |
|        | $\beta=60.0075$  |         |                 |         |         |         |
|        | $\gamma=75.1617$ | 1a      | Co <sup>2</sup> | 0.83382 | 0.99836 | 0.84120 |
|        | a=3.94870Å       | 1a      | Eu <sup>1</sup> | 0.67325 | 0.74659 | 0.42052 |
|        | b=7.91829Å       |         |                 |         |         |         |
|        | c=3.94906Å       | 1a      | Eu <sup>2</sup> | 0.32599 | 0.25211 | 0.59542 |



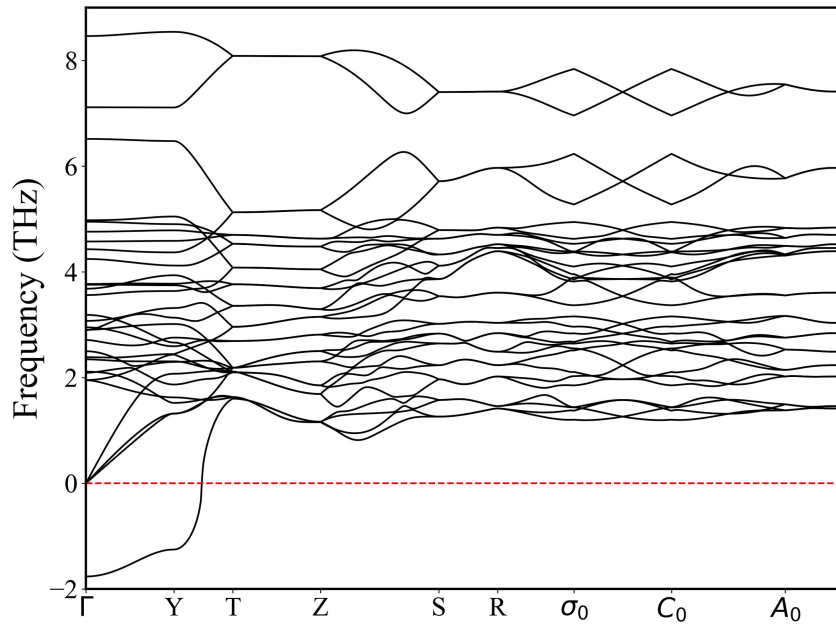

Fig. S9 Phonon band structures of  $\text{Eu}_2\text{Co}_3$ .
